# Supplementary material
Source: publisher site journal article supplement (http://static.cambridge.org/content/id/urn:cambridge.org:id:article:S1352465818000127/resource/name/S1352465818000127supp002.docx)
Supplement: Supplementary file 1 [file S1352465818000127supp002.docx]

Table S2

*Reliability estimates of the WBI scales across the range of the Safety Behaviors and Avoidance latent factors*

| Latent construct | Reliability | |
| --- | --- | --- |
|  | *Safety Behaviors* | *Avoidance* |
| -3 | 0.48 | 0.09 |
| -2.8 | 0.56 | 0.25 |
| -2.6 | 0.62 | 0.38 |
| -2.4 | 0.67 | 0.48 |
| -2.2 | 0.72 | 0.56 |
| -2 | 0.75 | 0.62 |
| -1.8 | 0.78 | 0.66 |
| -1.6 | 0.80 | 0.69 |
| -1.4 | 0.81 | 0.71 |
| -1.2 | 0.82 | 0.72 |
| -1 | 0.83 | 0.73 |
| -0.8 | 0.84 | 0.73 |
| -0.6 | 0.84 | 0.74 |
| -0.4 | 0.84 | 0.74 |
| -0.2 | 0.84 | 0.74 |
| 0 | 0.84 | 0.73 |
| 0.2 | 0.84 | 0.73 |
| 0.4 | 0.84 | 0.72 |
| 0.6 | 0.84 | 0.72 |
| 0.8 | 0.84 | 0.71 |
| 1 | 0.83 | 0.70 |
| 1.2 | 0.83 | 0.70 |
| 1.4 | 0.82 | 0.69 |
| 1.6 | 0.82 | 0.69 |
| 1.8 | 0.81 | 0.67 |
| 2 | 0.79 | 0.65 |
| 2.2 | 0.77 | 0.61 |
| 2.4 | 0.75 | 0.55 |
| 2.6 | 0.72 | 0.47 |
| 2.8 | 0.68 | 0.37 |
| 3 | 0.63 | 0.24 |
